# Supplementary material for: Latent dirichlet allocation for double clustering (LDA-DC): discovering patients phenotypes and cell populations within a single Bayesian framework
Source: Springer Nature journal article supplement (doi:10.1186/s12859-023-05177-4), 2023-02-23
Supplement: 12859_2023_5177_MOESM1_ESM.pdf [file 12859_2023_5177_MOESM1_ESM.pdf]

# Latent Dirichlet Allocation for Double Clustering (LDA-DC): Discovering patients phenotypes and cell populations within a single Bayesian framework

January 2023

## Supplementary Informations

| Tube | p-value t-test | Adjusted p-value | Mean Accuracy LDA-DC | Mean Accuracy K-means |
|------|----------------|------------------|----------------------|-----------------------|
| 1    | 0.804170       | 0.804170         | 0.692333             | 0.695610              |
| 2    | 0.150241       | 0.300481         | 0.742695             | 0.721526              |
| 3    | 0.372407       | 0.595851         | 0.587136             | 0.569103              |
| 4    | 0.000402       | 0.001608         | 0.937044             | 0.954188              |
| 5    | 0.715108       | 0.804170         | 0.806294             | 0.796111              |
| 6    | 0.000131       | 0.001044         | 0.889357             | 0.936771              |
| 7    | 0.136290       | 0.300481         | 0.718888             | 0.661792              |
| 8    | 0.450157       | 0.600210         | 0.705092             | 0.690496              |

**Table S1:** P-values and adjusted P-values of comparisons between K-means and LDA accuracies for the different AML experiment tubes. Adjusted p-value was performed using FDR methodology. Mean accuracy for multiple runs (20 runs) using LDA-DC method, and K-means for each tube.

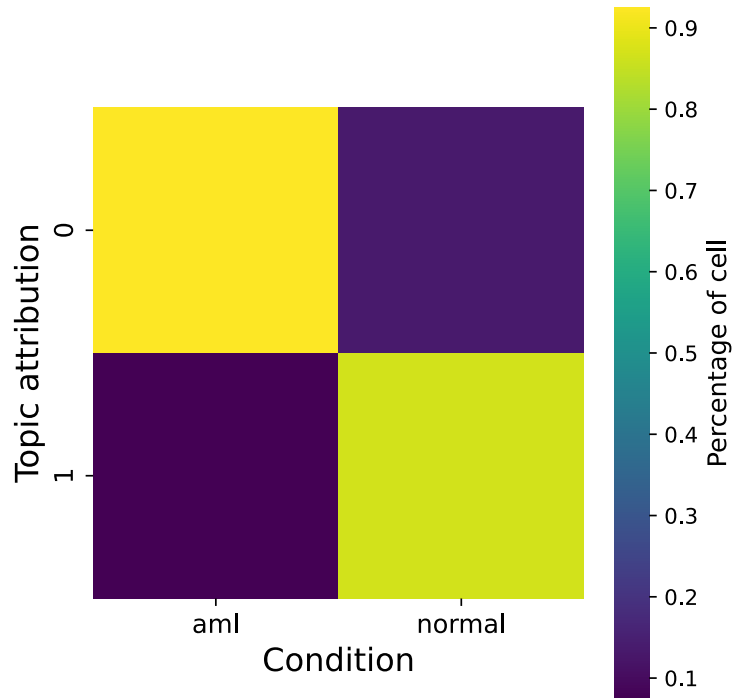

**Figure S1:** Quantification of cells assigned to Topic 0 and 1 from AML and non-AML patients associated to Figure 4D. The data are normalized by the number of sampled cells for AML and non-AML individuals.

| Topic | Condition |          |
|-------|-----------|----------|
|       | AML       | Normal   |
| 0     | 0.924839  | 0.131614 |
| 1     | 0.075161  | 0.868386 |

**Table S2:** Confusion Matrix associated to the heatmap Figure S1. We performed a  $\chi^2$  -test with p-value  $< 2.2e-16$  indicating that there is a significant difference in the distribution of the cells from AML and normal patients within the two topics.
